# Supplementary material
Source: PubMed Central journal article supplement (PMC6349091)
Supplement: ebc71751572b825e010975fdb84fd6d3_JB.00602-18-s0001.pdf [file ebc71751572b825e010975fdb84fd6d3_JB.00602-18-s0001.pdf]

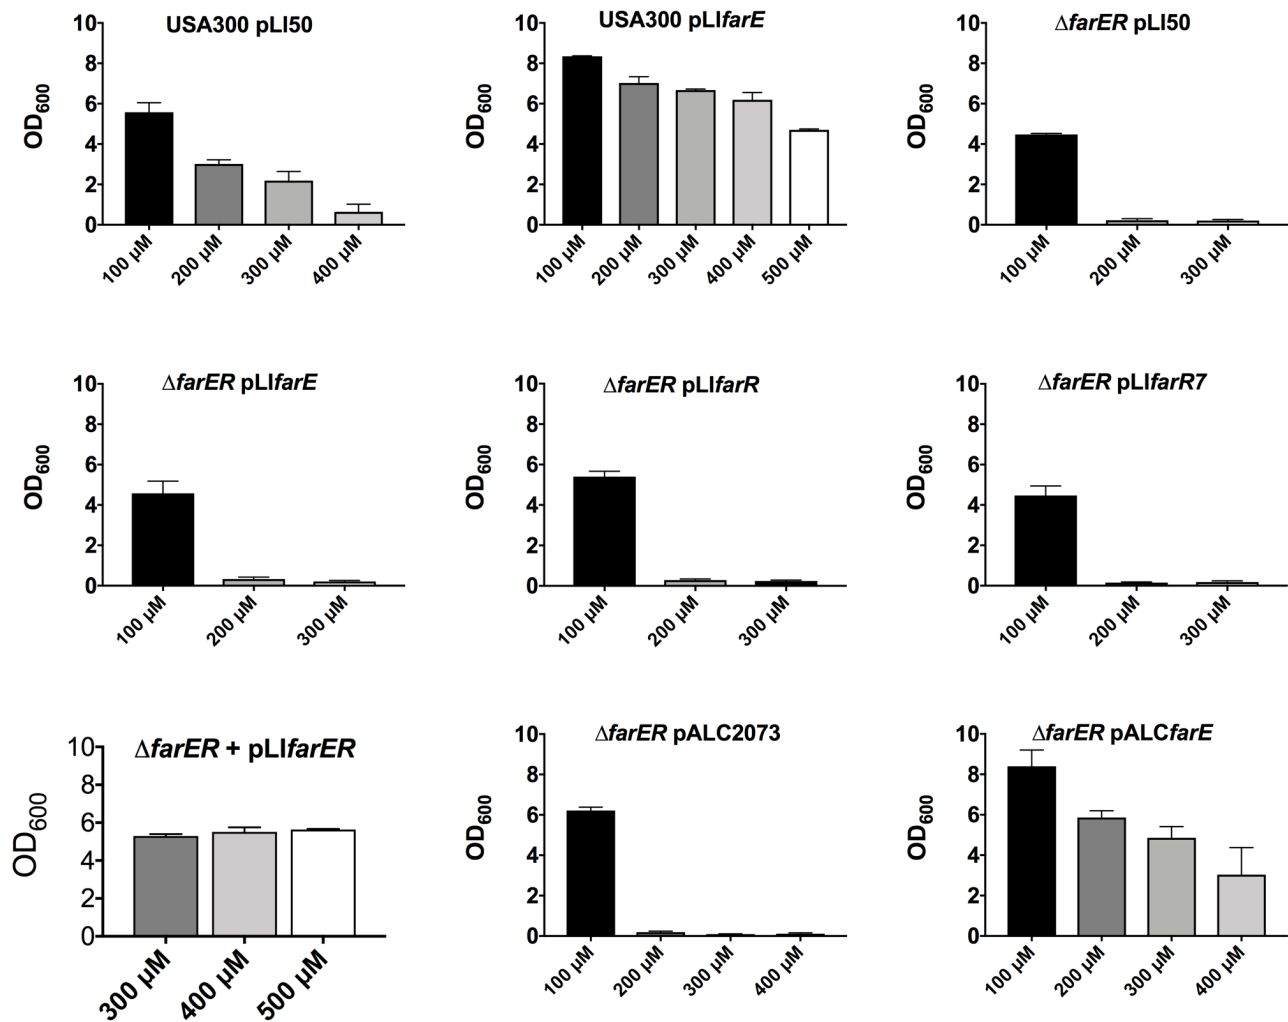

**Figure S1.** Data for MIC determination of *S. aureus* growth in TSB supplemented with linoleic acid. Inoculum cultures were grown to mid-exponential phase in TSB containing antibiotics as required, and 20 ng/mL anhydrotetracycline for cultures with pALC2073 or pALCfarE. Cultures were then inoculated into triplicate tubes of TSB containing varying concentrations of linoleic acid. Growth (OD<sub>600</sub>) was quantified after 24h and is plotted as the mean ± standard deviation of triplicate cultures.

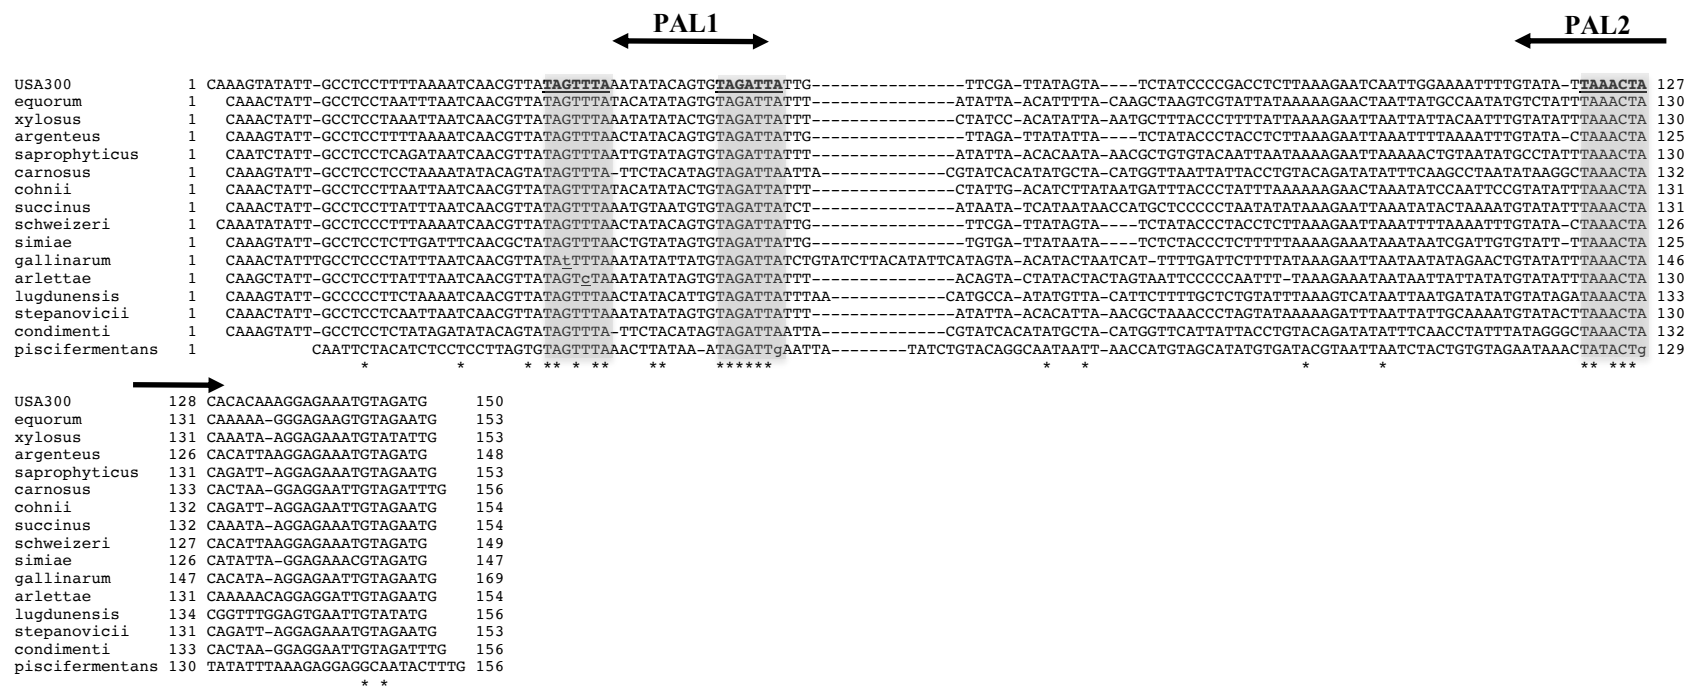

**Figure S2.** Alignment of *farER*<sup>IS</sup> segment from *S. aureus* USA300 with the syntenic sequence in coagulase negative staphylococci. A conserved TAGWTTA motif is indicated by underlined bold font in *S. aureus farER*<sup>IS</sup>, and this motif is shaded gray in all sequences. The span of nucleotides comprising PAL1 and PAL2 is demarcated by thick lines with arrows at each end. Nucleotides that are conserved in all sequences are indicated by asterisks below the bottom sequence.

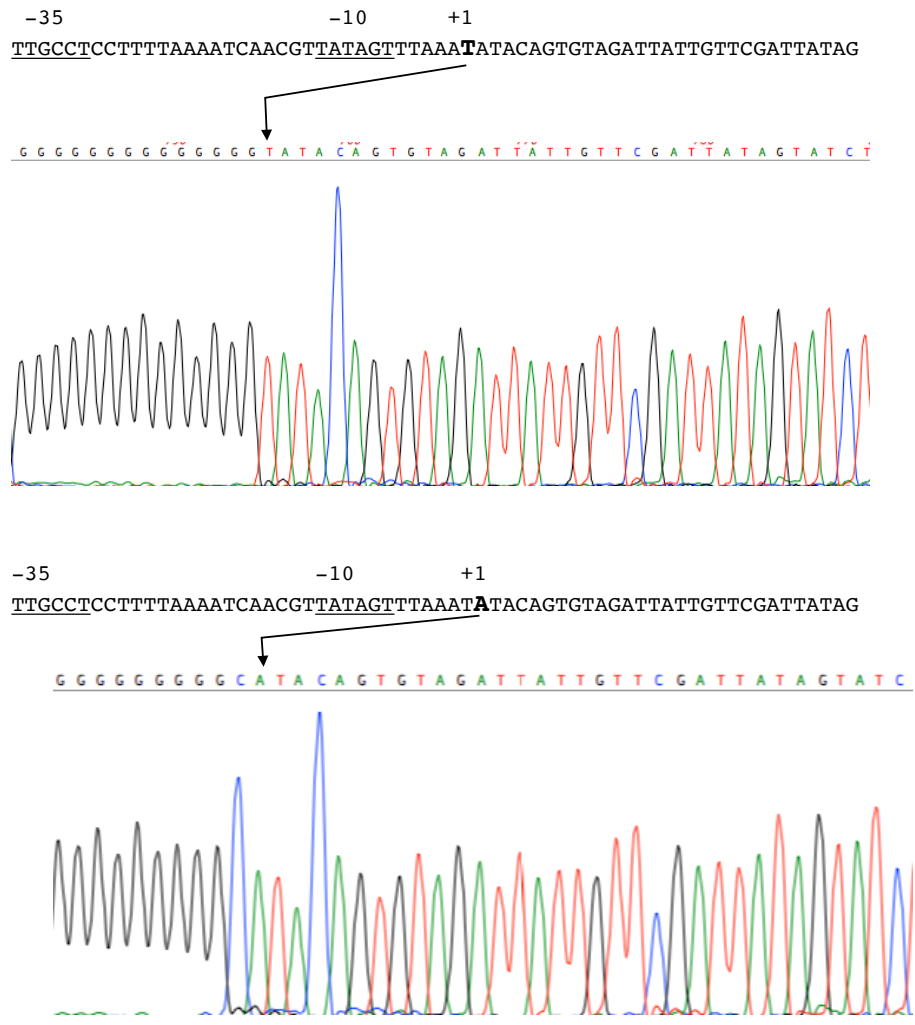

**Figure S3.** Sequence chromatograms from cloned 5'-RACE products for determination of the +1 transcription start site of  $P_{farR}$ . The nucleotide sequence of  $P_{farR}$  and downstream sequence is shown above each chromatogram, and underlined nucleotides identify the -35 and -10 motifs of  $P_{farR}$ . The transcription start site at two adjacent nucleotides is labelled as +1 above the sequence, and the +1 nucleotide is indicated in large bold font. Arrows point to the +1 nucleotide on the chromatogram.

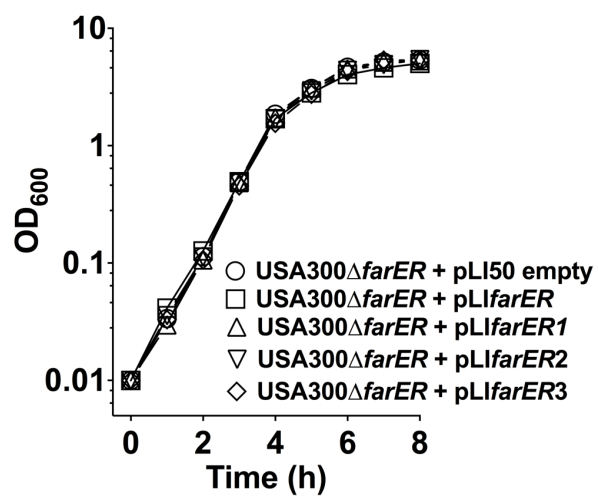

**Figure S4.** Growth of USA300Δ*farER* complemented with pLI50 or pLI*farER* and derivatives in TSB. Each data point represents the mean and standard deviation of triplicate cultures.

**Supplementary Table S1**

| Strain or plasmid                                        | Description                                                                                                       | Source or reference             |
|----------------------------------------------------------|-------------------------------------------------------------------------------------------------------------------|---------------------------------|
| <b>Strains:</b>                                          |                                                                                                                   |                                 |
| <b><i>S. aureus</i>:</b>                                 |                                                                                                                   |                                 |
| USA300 LAC                                               | Community associated MRSA; wild type strain cured of resistance plasmids                                          | (Arsic <i>et al.</i> , 2012)    |
| RN4220                                                   | $r_K^- m_K^+$ ; capable of accepting foreign DNA                                                                  | (Novick, 1991)                  |
| USA300 <i>farE</i> :: $\Phi$ NE                          | USA300 LAC with transposon insertion in <i>farE</i> (SAUSA300_2489); Erm <sup>r</sup> .                           | (Alnaseri <i>et al.</i> , 2015) |
| USA300 $\Delta$ <i>farER</i>                             | USA300 with <i>farER</i> deletion; constructed using pKOR $\Delta$ <i>farER</i>                                   | This study                      |
| USA300 $\Delta$ <i>fakA</i>                              | USA300 with <i>fakA</i> deletion; constructed using pKOR $\Delta$ <i>fakA</i>                                     | This study                      |
| USA300 $\Delta$ <i>farERfakA</i>                         | USA300 with deletion of <i>fakA</i> and <i>farER</i>                                                              | This study                      |
| USA300 $\Delta$ <i>farER</i> pLI50                       | USA300 $\Delta$ <i>farER</i> with pLI50; Cm <sup>r</sup>                                                          | This study                      |
| USA300 $\Delta$ <i>farER</i> pLI <i>farE</i>             | USA300 $\Delta$ <i>farER</i> complemented with pLI <i>farE</i> ; Cm <sup>r</sup>                                  | This study                      |
| USA300 $\Delta$ <i>farER</i> pLI <i>farER</i>            | USA300 $\Delta$ <i>farER</i> complemented with pLI <i>farER</i> ; Cm <sup>r</sup>                                 | This study                      |
| USA300 $\Delta$ <i>farER</i> pLI <i>farER1</i>           | USA300 $\Delta$ <i>farER</i> complemented with pLI <i>farER1</i> ; Cm <sup>r</sup>                                | This study                      |
| USA300 $\Delta$ <i>farER</i> pLI <i>farR</i>             | USA300 $\Delta$ <i>farER</i> complemented with pLI <i>farR</i> ; Cm <sup>r</sup>                                  | This study                      |
| USA300 $\Delta$ <i>farER</i> pLI <i>farR1</i>            | USA300 $\Delta$ <i>farER</i> complemented with pLI <i>farR1</i> ; Cm <sup>r</sup>                                 | This study                      |
| USA300 $\Delta$ <i>fakA</i> pALC2073                     | USA300 $\Delta$ <i>fakA</i> with empty pALC2073 complementation vector; Cm <sup>r</sup> .                         | This study                      |
| USA300 $\Delta$ <i>fakA</i> pAL <i>fak</i> <sup>ON</sup> | USA300 $\Delta$ <i>fakA</i> complemented with <i>fakA</i> cloned in plus orientation in pALC2073; Cm <sup>r</sup> | This study                      |

|                                                           |                                                                                                                      |            |
|-----------------------------------------------------------|----------------------------------------------------------------------------------------------------------------------|------------|
| USA300 $\Delta$ <i>fakA</i> pAL <i>fak</i> <sup>OFF</sup> | USA300 <sup><i>fakA</i></sup> complemented with <i>fakA</i> cloned in minus orientation in pALC2073; Cm <sup>r</sup> | This study |
|-----------------------------------------------------------|----------------------------------------------------------------------------------------------------------------------|------------|

***E. coli***

|              |                                                                                                                                                                                                                              |            |
|--------------|------------------------------------------------------------------------------------------------------------------------------------------------------------------------------------------------------------------------------|------------|
| DH5 $\alpha$ | F <sup>-</sup> $\Phi$ 80 <i>lacZ</i> $\Delta$ M15 <i>recA1 endA1 gyrA96 thi-1 hsdR17</i> (r <sub>K</sub> <sup>-</sup> m <sub>K</sub> <sup>+</sup> ) <i>supE44 relA1 deoR</i> $\Delta$ ( <i>lacZYA-argF</i> )U169 <i>phoA</i> | Invitrogen |
|--------------|------------------------------------------------------------------------------------------------------------------------------------------------------------------------------------------------------------------------------|------------|

|            |                                                                                                                                                                                             |        |
|------------|---------------------------------------------------------------------------------------------------------------------------------------------------------------------------------------------|--------|
| M15[pREP4] | F <sup>-</sup> , $\Phi$ 80 <i>lacZ</i> $\Delta$ M15 <i>thi lac mtl recA</i> <sup>+</sup> ; Host strain for pQE30. Contains pREP4 (Km <sup>r</sup> ) with constitutive <i>lacI</i> repressor | Qiagen |
|------------|---------------------------------------------------------------------------------------------------------------------------------------------------------------------------------------------|--------|

**Plasmids:**

|       |                                                  |                         |
|-------|--------------------------------------------------|-------------------------|
| pLI50 | <i>E. coli</i> - <i>S. aureus</i> shuttle vector | (Lee and Iandolo, 1986) |
|-------|--------------------------------------------------|-------------------------|

|       |                                                                                |        |
|-------|--------------------------------------------------------------------------------|--------|
| pQE30 | <i>E. coli</i> vector for expression of N-terminal 6His-tagged fusion proteins | Qiagen |
|-------|--------------------------------------------------------------------------------|--------|

|          |                                                                                                                                                                                                              |                                |
|----------|--------------------------------------------------------------------------------------------------------------------------------------------------------------------------------------------------------------|--------------------------------|
| pALC2073 | Shuttle vector used for expression of genes under control of tetracycline-inducible P <sub><i>xyl/tetO</i></sub> promoter in <i>S. aureus</i> ; genes are expressed at a basal level in absence of induction | (Bateman <i>et al.</i> , 2001) |
|----------|--------------------------------------------------------------------------------------------------------------------------------------------------------------------------------------------------------------|--------------------------------|

|          |                                                                                                                                                                     |            |
|----------|---------------------------------------------------------------------------------------------------------------------------------------------------------------------|------------|
| pQE-FarR | <i>farR</i> open reading frame amplified from USA300 with primers 6H <i>farR</i> -F and 6H <i>farR</i> -R, cloned at <i>SacI</i> and <i>HindIII</i> sites of pQE30. | This study |
|----------|---------------------------------------------------------------------------------------------------------------------------------------------------------------------|------------|

|                            |                                                                          |            |
|----------------------------|--------------------------------------------------------------------------|------------|
| pQE- <sup>H121Y</sup> FarR | As for pQE-FarR, except that template DNA was from <i>S. aureus</i> FAR7 | This study |
|----------------------------|--------------------------------------------------------------------------|------------|

|                 |                                                       |                                 |
|-----------------|-------------------------------------------------------|---------------------------------|
| pLI <i>farR</i> | pLI50 with <i>farR</i> expressed from native promoter | (Alnaseri <i>et al.</i> , 2015) |
|-----------------|-------------------------------------------------------|---------------------------------|

|                  |                                                                                                                                                 |            |
|------------------|-------------------------------------------------------------------------------------------------------------------------------------------------|------------|
| pLI <i>farR1</i> | pLI <i>farR</i> after mutagenesis with <i>farR1</i> -P and <i>farR1</i> -M primers; G>A substitution in -10 motif of P <sub><i>farR</i></sub> . | This study |
|------------------|-------------------------------------------------------------------------------------------------------------------------------------------------|------------|

|                  |                                                                                                                    |            |
|------------------|--------------------------------------------------------------------------------------------------------------------|------------|
| pLI <i>farR2</i> | Mutagenesis of pLI <i>farR</i> with primers <i>farR2</i> -P and <i>farR2</i> -M; nucleotide substitutions in PAL1. | This study |
|------------------|--------------------------------------------------------------------------------------------------------------------|------------|

|                                |                                                                                                                                                                                                              |                                 |
|--------------------------------|--------------------------------------------------------------------------------------------------------------------------------------------------------------------------------------------------------------|---------------------------------|
| pLI <i>farR3</i>               | Mutagenesis of pLI <i>farR1</i> with primers <i>farR3</i> -P and <i>farR3</i> -M                                                                                                                             | This study                      |
| pLI <i>farE</i>                | pLI50 with <i>farE</i> expressed from native promoter                                                                                                                                                        | (Alnaseri <i>et al.</i> , 2015) |
| pLI <i>farER</i>               | <i>farE</i> excised from pLI <i>farE</i> with <i>KpnI</i> - <i>SacII</i> , and ligated into <i>KpnI</i> - <i>SacII</i> digested pLI <i>farR</i> .                                                            | This study                      |
| pLI <i>farER1</i>              | As for pLI <i>farER</i> , except that the <i>KpnI</i> - <i>SacII</i> fragment was ligated into pLI <i>farR1</i>                                                                                              | This study                      |
| pLI <i>farER2</i>              | As for pLI <i>farER</i> , except that <i>KpnI</i> - <i>SacII</i> fragment was ligated into pLI <i>farR2</i>                                                                                                  | This study                      |
| pLI <i>farER3</i>              | As for pLI <i>farER</i> , except that <i>KpnI</i> - <i>SacII</i> fragment was ligated into pLI <i>farR3</i>                                                                                                  | This study                      |
| pGY <i>lux</i>                 | <i>E. coli</i> - <i>S. aureus</i> shuttle vector harboring promoterless <i>luxABCDE</i> operon                                                                                                               | (Mesak <i>et al.</i> , 2009)    |
| pGY <i>farE::lux</i>           | <i>farE</i> promoter segment cloned in pGY <i>lux</i>                                                                                                                                                        | (Alnaseri <i>et al.</i> , 2015) |
| pGY <i>farR::lux</i>           | <i>farR</i> promoter segment amplified with primers <i>farR::lux</i> -F and <i>farR::lux</i> -R, cloned in pGY <i>lux</i>                                                                                    | This study                      |
| pGY <i>farR1::lux</i>          | As for pGY <i>farR::lux</i> , using plasmid pLI <i>farR1</i> as template for PCR                                                                                                                             | This study                      |
| pKOR-1                         | <i>E. coli</i> - <i>S. aureus</i> shuttle vector (Cm <sup>r</sup> ); contains P <sub><i>xyI/tetO</i></sub> ; antisense <i>secY</i> RNA expression                                                            | (Bae and Schneewind, 2006)      |
| pKORΔ <i>farER</i>             | pKOR-1 containing ligated PCR products generated with primer pairs <i>farE</i> -UP- <i>attB1</i> / <i>farE</i> -UP- <i>SacII</i> and <i>farR</i> -DW- <i>SacII</i> / <i>farR</i> -DW- <i>attB2</i> .         | This study                      |
| pKORΔ <i>fakA</i>              | pKOR-1 containing ligated PCR products generated with primer pairs <i>fakA</i> -UP- <i>attB1</i> / <i>fakA</i> -UP- <i>SacII</i> , and <i>fakA</i> -DW- <i>SacII</i> / <i>fakA</i> -DW- <i>attB2</i>         | This study                      |
| pALC <i>fakA</i> <sup>ON</sup> | Promoterless <i>fakA</i> gene amplified by PCR with primers <i>fakA</i> -pALC-F and <i>fakA</i> -pALC-R, cloned in plus orientation ( <i>KpnI</i> ) with respect to P <sub><i>xyI/tetO</i></sub> in pALC2073 | This study                      |

|                                 |                                                                                                                                          |            |
|---------------------------------|------------------------------------------------------------------------------------------------------------------------------------------|------------|
| pALC <i>fakA</i> <sup>OFF</sup> | As above, but gene segment cloned in minus orientation                                                                                   | This study |
| pALC <i>farE</i>                | Promoterless <i>farE</i> amplified with primers pALC- <i>farE</i> -F and pALC- <i>farE</i> -R, cloned in to <i>SacI</i> site of pALC2073 | Thus study |

### Supplementary Table S2

| Oligonucleotide                            | Description <sup>a</sup>                                               |
|--------------------------------------------|------------------------------------------------------------------------|
| <i>farE</i> -UP- <i>attB1</i> <sup>b</sup> | <i>attB1</i> -TTCCTTTGCCTGTACGTGC                                      |
| <i>farE</i> -UP- <i>SacII</i> <sup>c</sup> | ggacct <b>ccg</b> cggaACGATGGCATTGTACCAAG                              |
| <i>farR</i> -DW- <i>SacII</i> <sup>c</sup> | ggacct <b>ccg</b> cgggGCGAAGATATTGATAACATTTTCC                         |
| <i>farR</i> -DW- <i>attB2</i> <sup>d</sup> | <i>attB2</i> -GGTAAATTAGAACAAGGTGGCG                                   |
| <i>farR</i> -GSP1                          | TTATCTGGGATGTCGCTG                                                     |
| <i>farR</i> -GSP2                          | CCCGTCGACTCAGCGTCTTCTTCTTGG                                            |
| <i>farR</i> -GSP3                          | ATTGTCGACACTCATCGTTTGGGAATGG                                           |
| <i>farR</i> :: <i>lux</i> -F <sup>e</sup>  | <b>cccgatcc</b> TGCAGCTACAATCACTATCCATGC                               |
| <i>farR</i> :: <i>lux</i> -R <sup>f</sup>  | <b>cccgtc</b> gacTAAATCAGTCTCTTTTCATCTACATTTCTCC                       |
| <i>farE</i> -pALC-F <sup>g</sup>           | CACTGTATATTTAAACTATAA <b>gagctc</b> TTTTAAAAGGAGGCAAT<br>ATACTTGGT     |
| <i>farE</i> -pALC-R <sup>g</sup>           | CACTTCCATGCAAAAACCCT <b>gagctc</b> CAAATGTCATTGATAGAC                  |
| 6H <i>farR</i> -F <sup>g</sup>             | CTACACACAAAGGAGAAATGT <b>agagctc</b> ATGAAAGAGACTGAT<br>TTACGAG        |
| 6H <i>farR</i> -R <sup>h</sup>             | GGTAACGCTCATGAGTTTCT <b>aagctt</b> CTATTTAATCTTAATATTG<br>ATTAATCTATGG |



*fakA*-UP-*attB1*<sup>b</sup>    *attB1*-GCGTGTGAACGTCTGTTACCAGTCGAAGC  
*fakA*-UP-*SacII*<sup>c</sup>    ggacct**ccg**cgggCATTTC AAGTTGTCCTCCTAAGCTTTCTTGC  
*fakA*-DW-*SacII*<sup>c</sup>    ggacct**ccg**cgggGTTTCATGAAGGTGGACAACCAATTTATC  
*fakA*-DW-*attB2*<sup>d</sup>    *attB2*-GATGACTTTTCTAATCTATTTAGCCATTGC  
*farR1*-P<sup>i</sup>            CCTTTTAAAATCAACGTTATAaTTTAAATATACAGTGTAG  
*farR1*-M<sup>i</sup>            CTACACTGTATATTTAAAtTATAACGTTGATTTTAAAAGG  
*farR2*-P<sup>j</sup>            ATCAACGTTATAGTTTAAATATttAGatTAGATTATTGTTTCGATT  
ATAGTATC  
*farR2*-M<sup>j</sup>            GATACTATAATCGAACAATAATCTAatCTaaATATTTAAACTAT  
AACGTTGAT  
*farR3*-P<sup>j</sup>            ATCAACGTTATAATTTAAATATttAGatTAGATTATTGTTTCGATT  
ATAGTATC  
*farR3*-M<sup>j</sup>            GATACTATAATCGAACAATAATCTAatCTaaATATTTAAATTAT  
AACGTTGAT  
*fakA*-pALC-F<sup>k</sup>      **ttt**ggtaccACAGGCAAGAAAGCTTAGGAGGAC  
*fakA*-pALC-R<sup>k</sup>      **ttt**ggtaccGCAACTCGAGAACGATACTTTTAACC  
*farER*<sup>IS</sup>-F<sup>1</sup>        /5IRD800/CCCCATCTTATATAAAAATTTTGCC  
*farER*<sup>IS</sup>-R<sup>1</sup>        CTACATTTCTCCTTTGTGTGTAG  
*farER*<sup>IS</sup>-F<sup>2</sup>        ATGACCGCGGACCATTTATGT  
*farER*<sup>IS</sup>-R<sup>2</sup>        GTACGGTGTACGAGTGCGTT  
*farER*<sup>UP</sup>-F<sup>1</sup>        /5IRD800/GTTTTTCAATCTTTTTATTTCGTATCTAACG  
*farER*<sup>UP</sup>-R         GATGGGGACATTCATCGC  
*farER*<sup>DW</sup>-F<sup>1</sup>        /5IRD800/GATGAAAGAGACTGATTTACGAG  
*farER*<sup>DW</sup>-R         CATATTTATCATAAAAATGTTTATAAAAATGTTGTACGG

|                                       |                                                                    |
|---------------------------------------|--------------------------------------------------------------------|
| IRD800 <sup>OP1</sup> <sup>1</sup>    | /5IRD800/GTATATTGCCTCCTTTTAAAATCAACGTTATAGTTTAAATATA               |
| IRD800 <sup>OP2</sup> <sup>1</sup>    | /5IRD800/GTTATAGTTTAAATATACAGTGTAGATTATTGTTTCGATTATAG              |
| IRD800 <sup>OP3</sup> <sup>1</sup>    | /5IRD800/TTATTGTTTCGATTATAGTATCTATCCCCGACCTCTTAAGAAT               |
| IRD800 <sup>OP4</sup> <sup>1</sup>    | /5IRD800/GAATCAATTGGAAAATTTTGTATATTAACACTACACA<br>CAAAGGAGAAATGTAG |
| IRD800 <sup>OP4.1</sup> <sup>1</sup>  | /5IRD800/TGTGTGTAGTTTAAATATACAAAAT                                 |
| IRD800 <sup>OP5</sup> <sup>1</sup>    | /5IRD800/AGTTTAAATATACAGTGTAGATTATTGTT                             |
| IRD800 <sup>OP5.1</sup> <sup>1</sup>  | /5IRD800/TTTAAATATACAGTGTAGATTATTG                                 |
| IRD800 <sup>OP5.2</sup> <sup>li</sup> | /5IRD800/TTTAAATATACAGTGTAaATTATTG                                 |
| OP1.1                                 | GTATATTGCCTCCTTTTAAAATCAACGTTA                                     |
| OP1.2                                 | GCCTCCTTTTAAAATCAACGTTATAGTTTAA                                    |
| OP1.3                                 | TTTTAAAATCAACGTTATAGTTTAAATATA                                     |
| <sup>i</sup> OP1.3 <sub>G&gt;A</sub>  | TTTTAAAATCAACGTTATA <u>a</u> TTTTAAATATA                           |
| IRD800 <sup>OP1.3</sup> <sup>1</sup>  | /5IRD800/TTTTAAAATCAACGTTATAGTTTAAATATA                            |

---

<sup>a</sup>Additions to or modification of primer sequences include addition of <sup>b</sup>*attB1* GGGGACAAGTTTGTACAAAAAAGCAGGCT or <sup>d</sup>*attB2* GGGGACCACTTTGTACAAGAAAGCTGGGT; restriction sites (lower case bold) <sup>c</sup>*SacII*, <sup>e</sup>*BamHI*, <sup>f</sup>*SalI*, <sup>g</sup>*SacI*, <sup>h</sup>*HindIII*, <sup>k</sup>*KpnI*; <sup>l</sup>IRD800 fluorophore for EMSA (complementary non-labelled strand is not shown); substitutions in mutagenic oligonucleotides (lower case underlined) <sup>i</sup>G>A substitution in <sup>-10</sup>P<sub>farR</sub>, <sup>j</sup>substitutions in IR1 and IR2-octamers of PAL1, or <sup>m</sup>substitutions in both <sup>-10</sup>P<sub>farR</sub> and PAL1

#### References:

Alnaseri, H., Arsic, B., Schneider, J.E.T., Kaiser, J.C., Scinocca, Z.C., Heinrichs, D.E., and McGavin, M.J. (2015) Inducible expression of a resistance-nodulation-division-type efflux pump

in *Staphylococcus aureus* provides resistance to linoleic and arachidonic Acids. *J Bacteriol* **197**: 1893–905.

Arsic, B., Zhu, Y., Heinrichs, D.E., and McGavin, M.J. (2012) Induction of the staphylococcal proteolytic cascade by antimicrobial fatty acids in community acquired methicillin resistant *Staphylococcus aureus*. *PLoS One* **7**.

Bae, T., and Schneewind, O. (2006) Allelic replacement in *Staphylococcus aureus* with inducible counter-selection. *Plasmid* **55**: 58–63.

Bateman, B.T., Donegan, N.P., Jarry, T.M., Palma, M., and Cheung, A.L. (2001) Evaluation of a tetracycline-inducible promoter in *Staphylococcus aureus* *in vitro* and *in vivo* and its application in demonstrating the role of *sigB* in microcolony formation. *Infect Immun* **69**: 7851–7857.

Lee, C.Y., and Iandolo, J.J. (1986) Integration of staphylococcal phage L54a occurs by site-specific recombination: structural analysis of the attachment sites. *Proc Natl Acad Sci U S A* **83**: 5474–5478.

Mesak, L.R., Yim, G., and Davies, J. (2009) Improved *lux* reporters for use in *Staphylococcus aureus*. *Plasmid* **61**: 182–187.

Novick, R.P. (1991) Genetic systems in staphylococci. *Methods Enzym* **204**: 587–636.
